# Supplementary material
Source: Springer Nature journal article supplement (https://www.springermedizin.de/resource/supplementary/12943_2012_1015_MOESM8_ESM.pdf/9552122)

(a)

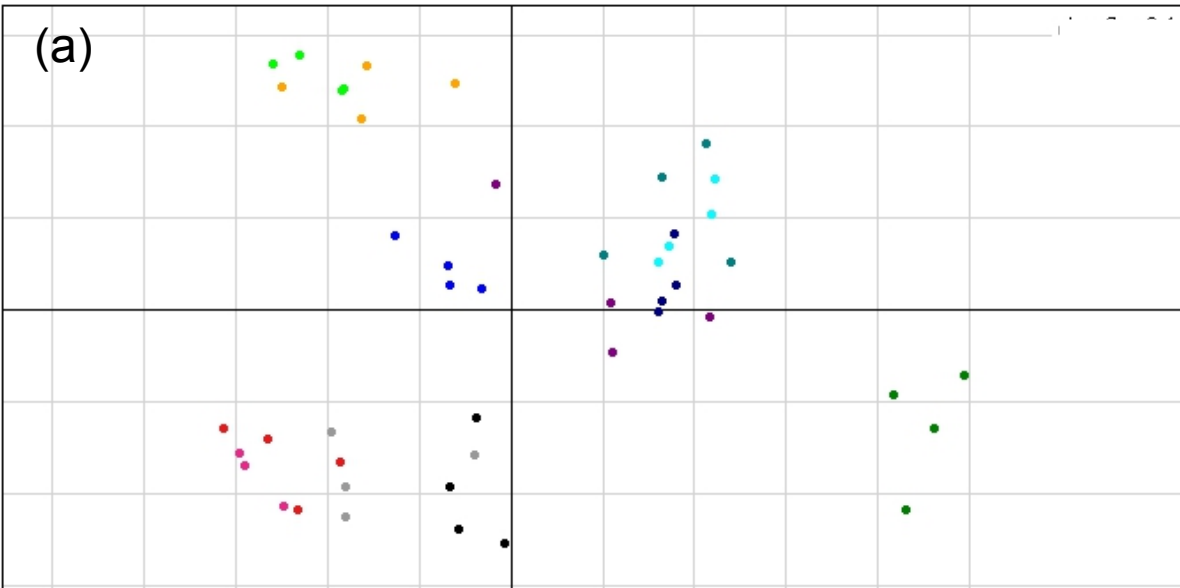

(b)

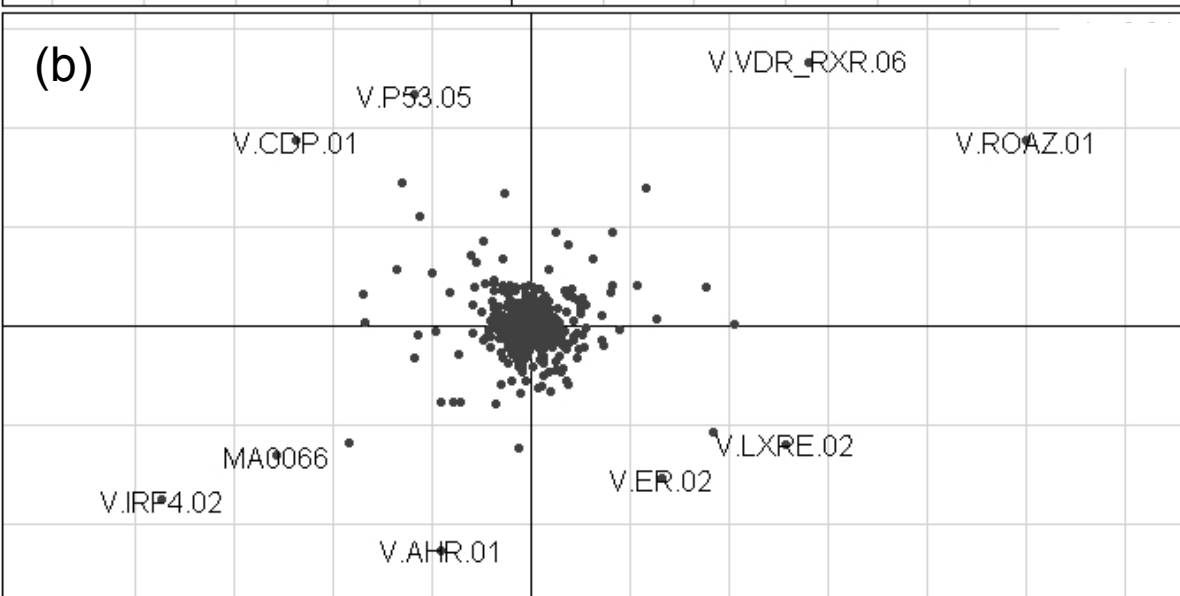

Supplement: MOESM8 [file 9552122]
